# Supplementary material for: 2D/1D Bi12O17Cl2/β-Bi2O3 heterojunction photocatalysts with boosted photocatalytic performance
Source: Royal Society of Chemistry journal article supplement (doi:10.1039/d1ce00472g), 2021-01-01
Supplement: d1ce00472g1.pdf [file d1ce00472g1.pdf]

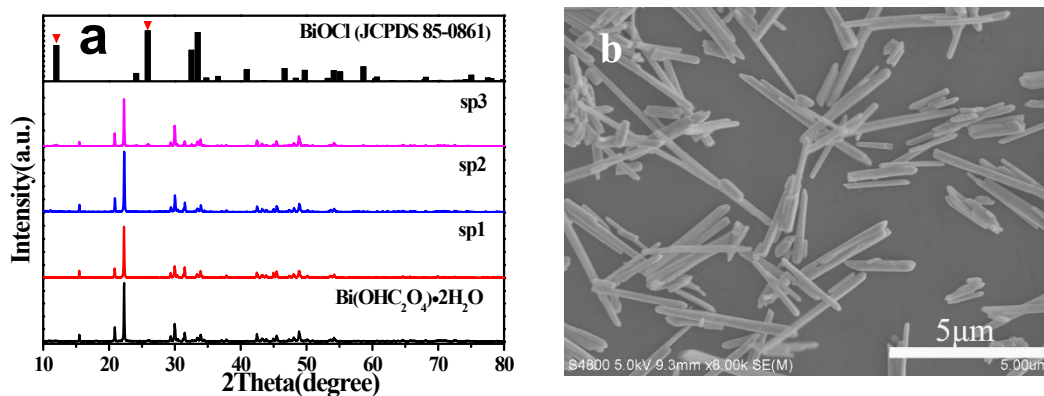

**Figure S1.** (a) XRD patterns of  $\text{Bi}(\text{OHC}_2\text{O}_4)\cdot 2\text{H}_2\text{O}$ - $\text{BiOCl}$  precursors (sp1-sp3),  $\text{Bi}(\text{OHC}_2\text{O}_4)\cdot 2\text{H}_2\text{O}$  and  $\text{BiOCl}$ ; (b) SEM image of pure  $\text{Bi}(\text{OHC}_2\text{O}_4)\cdot 2\text{H}_2\text{O}$ .

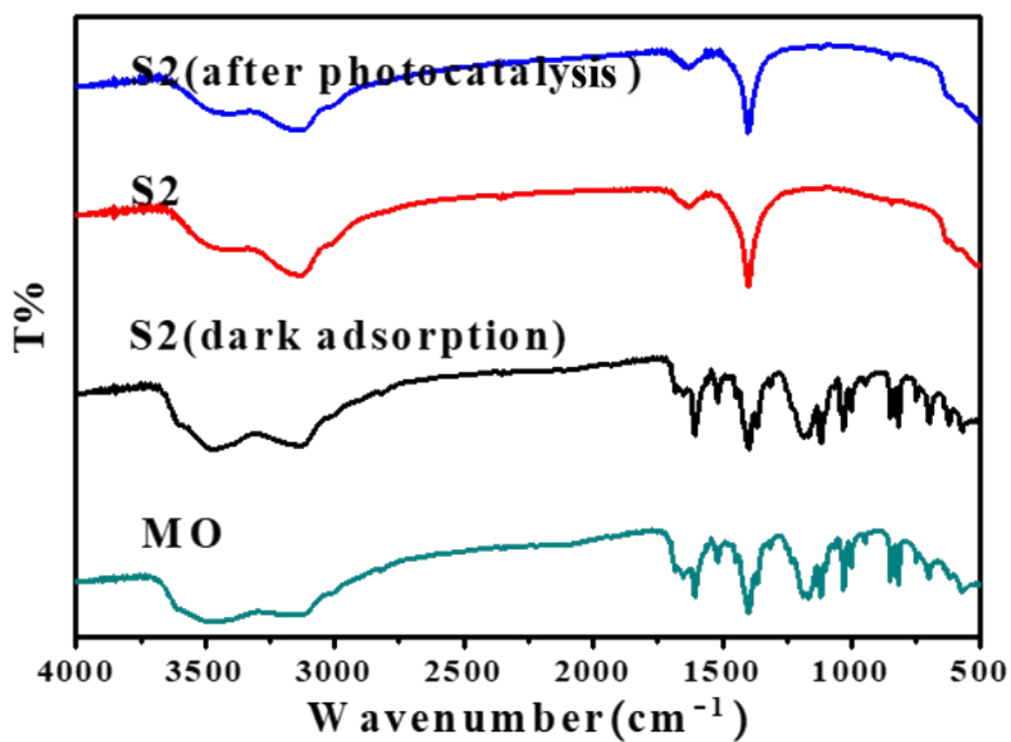

**Figure S2.** IR spectra of MO, S2, S2(dark adsorption), S2(after photocatalysis)

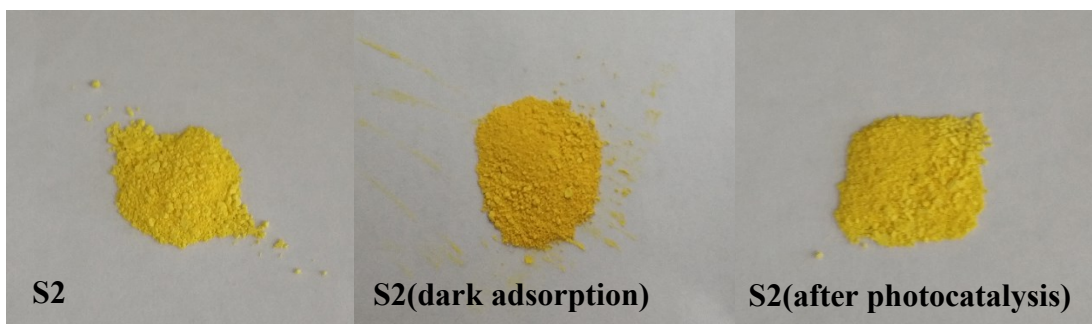

**Figure S3.** Samples of S2, S2(dark adsorption), S2(after photocatalysis)

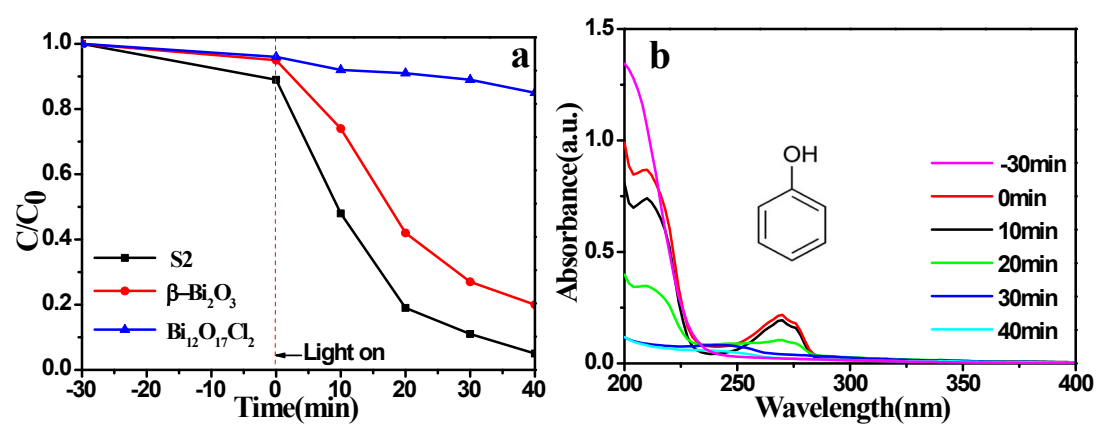

**Figure S4.** (a) Photocatalytic degradation curves of phenol (mol·L<sup>-1</sup>) using different photocatalysts, (b) UV-Vis absorption spectra of phenol S2 as photocatalyst under solar light irradiation.
